# Supplementary material
Source: publisher figshare collection journal article supplement (https://gsajournals.figshare.com/ndownloader/files/15204137)
Supplement: Supplementary file 1 [file 15204137]

**Table S3** Predicted residual error sum of squares (PRESS) of genomic selection models using tetraploid dosage (GS-TD) for organic matter (OM), crude protein (CP), *in vitro* digestibility of organic matter (IVD), leaf dry matter (LDM), regrowth capacity (RC), and percentage of leaf blade (PLB). Molecular data contains 41,424 markers.

| Model | OM | CP | IVD | LDM | RC | PLB |
| --- | --- | --- | --- | --- | --- | --- |
| GBLUP-TD | 90.4495 | 98.0999 | 435.4498 | 2603994 | 116.7085 | 2476.148 |
| BRR-TD | 90.2800 | 98.2686 | 438.0750 | 2616551 | 115.7767 | 2503.678 |
| BA-TD | 90.3069 | 99.0743 | 443.2646 | 2644412 | 115.7348 | 2541.937 |
| BB-TD | 89.9856 | 98.4550 | 439.5213 | 2618234 | 115.8339 | 2505.119 |
| BC-TD | 90.2337 | 98.1835 | 437.4437 | 2610263 | 115.9343 | 2494.210 |
| BL-TD | 90.3840 | 98.0920 | 436.7276 | 2778360 | 115.0370 | 2507.217 |
